# Supplementary material for: Zeolitic imidazolate framework-8 coated Fe3O4@SiO2 composites for magnetic solid-phase extraction of bisphenols
Source: Royal Society of Chemistry journal article supplement (doi:10.1039/d0nj00006j), 2020-01-01
Supplement: d0nj00006j1.pdf [file d0nj00006j1.pdf]

**Electronic Supplementary Information**

2

**3 Zeolitic Imidazolate Framework-8 Coated  $\text{Fe}_3\text{O}_4@\text{SiO}_2$  Composites**  
**4 for Magnetic Solid-Phase Extraction of Bisphenols**

5 Jinfei Liu, Huijiao Qiu, Fei Zhang\*, Yan Li\*

6 *Key Laboratory of Inorganic-Organic Hybrid Functional Materials Chemistry*  
7 *(Tianjin Normal University), Tianjin Key Laboratory of Structure and Performance*  
8 *for Functional Molecule, College of Chemistry, Tianjin Normal University, Tianjin,*  
9 *300387, P.R. China.*

10 \* E-mail: nkliyan398@gmail.com (Y. Li)

11 [hxxyzf@tjnu.edu.cn](mailto:hxxyzf@tjnu.edu.cn) (F. Zhang)

12

13

14

## 1 **Synthesis of Fe<sub>3</sub>O<sub>4</sub>**

2 Briefly, a mixture of FeCl<sub>3</sub>·6H<sub>2</sub>O (1.35 g) and anhydrous sodium acetate (3.60 g)  
3 in glycol (40 mL) was stirred vigorously for 30 min, then transferred into a Teflon-  
4 lined autoclave and reacted at 200 °C for 8 h to give Fe<sub>3</sub>O<sub>4</sub> magnetic microspheres.  
5 After cooling to room temperature, the black magnetic microspheres were collected  
6 by a magnet, washed with ethanol and ultrapure water 4 times, and then the products  
7 were dried under vacuum at 60 °C for 12 h.

## 8 **Synthesis of Fe<sub>3</sub>O<sub>4</sub>@SiO<sub>2</sub>**

9 Fe<sub>3</sub>O<sub>4</sub> microspheres (0.10 g) were first dispersed in a mixture of ethanol (100  
10 mL), H<sub>2</sub>O (20 mL) and concentrated ammonia aqueous solution (0.5 mL, 25-28%,  
11 w/w) with the help of ultrasonication. After the mixed solution was sonicated for 4 h,  
12 TEOS (0.5 mL) was added into the above dispersion. Subsequently, the reaction was  
13 allowed to proceed for 4 h. Finally, the Fe<sub>3</sub>O<sub>4</sub>@SiO<sub>2</sub> microspheres were separated  
14 using a magnet and washed with ethanol and ultrapure water 4 times, and then dried  
15 under vacuum at 60 °C for 12 h.

## 16 **Carboxyl modification of Fe<sub>3</sub>O<sub>4</sub>@SiO<sub>2</sub>**

17 APTES silane coupling agent and glutaric anhydride were used to modify  
18 carboxyl on the Fe<sub>3</sub>O<sub>4</sub>@SiO<sub>2</sub> microspheres. Typically, glutaric anhydride (0.168 g),  
19 APTES (0.455 mL) and DMF (12 mL) were mixed in a 50 mL round-bottom flask  
20 and stirred for 3 h at 60 °C. Subsequently, the hybrid solution containing Fe<sub>3</sub>O<sub>4</sub>@SiO<sub>2</sub>  
21 microspheres (0.300 g), DMF (10 mL), and H<sub>2</sub>O (0.9 mL) was added to the above  
22 dispersion and stirred for 5 h. Finally, the products were separated by a magnet and  
23 washed with ethanol 4 times, and then dried under vacuum at 60 °C for 12 h.

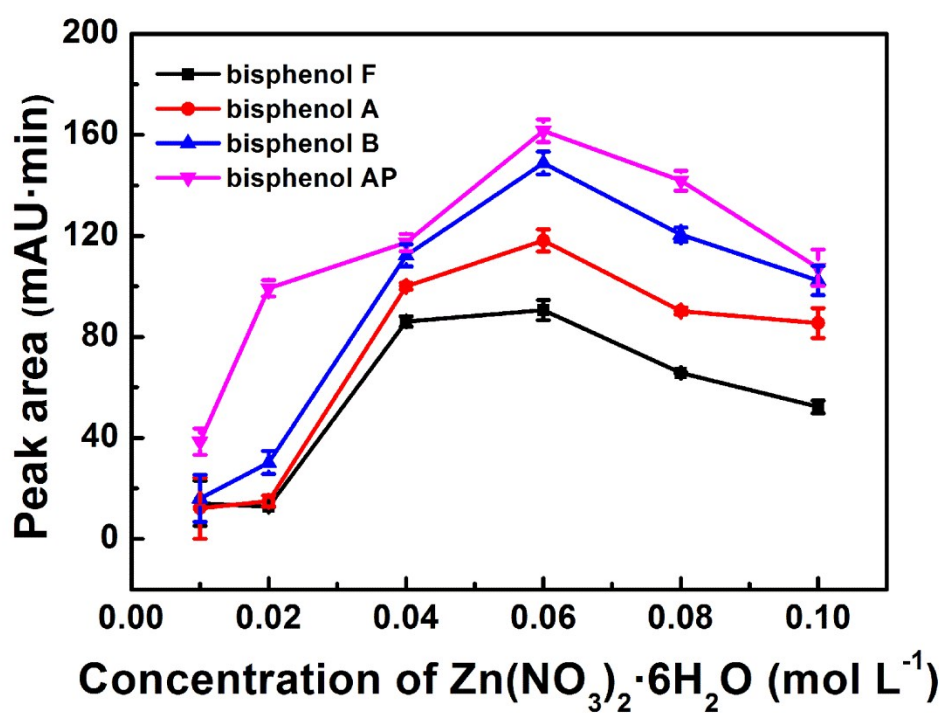

1

2 Fig. S1. Effect of the concentration of  $\text{Zn}(\text{NO}_3)_2 \cdot 6\text{H}_2\text{O}$  on the extraction efficiency of  
 3 bisphenols (The concentration of 2-methylimidazole in the solution was always 3:1 to  
 4  $\text{Zn}(\text{NO}_3)_2 \cdot 6\text{H}_2\text{O}$ ).

5

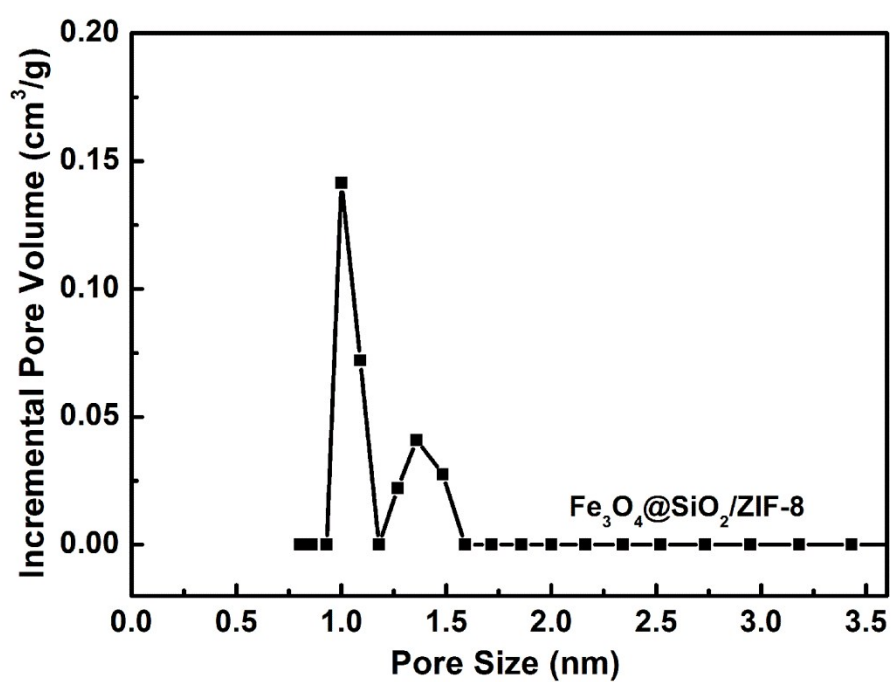

1

2 Fig. S2. Pore size distribution curves of  $\text{Fe}_3\text{O}_4@\text{SiO}_2/\text{ZIF-8}$ .

3

Table S1 Instrumental operations conditions for HPLC.

| parameter            | setting                                                        |
|----------------------|----------------------------------------------------------------|
| instrumental model   | 1260 series                                                    |
| column type          | reversed phase C18 column (5 $\mu$ m, 4.6 mm $\times$ 250 mm,) |
| column temperature   | 30 $^{\circ}$ C                                                |
| the mobile phase     | Acetonitrile, pure water                                       |
| mobile phase ratio   | Acetonitrile: 60%<br>pure water: 40%                           |
| flow rate            | 0.9 mL/min                                                     |
| detection wavelength | 225 nm                                                         |
| bandwidth            | 4 nm                                                           |
| injection volume     | 20 $\mu$ L                                                     |
| run time             | 10 min                                                         |
